# Supplementary material
Source: PubMed Central journal article supplement (PMC2651753)

## Supporting Information

### Sulindac Derivatives That Activate the Peroxisome Proliferator-activated Receptor $\gamma$ but Lack Cyclooxygenase Inhibition

Andrew S. Felts, Brianna S. Siegel, Shiu M. Young, Christopher W. Moth, Terry P.  
Lybrand, Andrew J. Dannenberg, Lawrence J. Marnett and Kotha Subbaramaiah

#### Contents

HPLC analysis of compounds – All compounds were run on a Phenomenex  $^{18}\text{C}$  10 x 0.2  
cm 3  $\mu\text{M}$  particle size at 40 °C. UV absorbance was measured at 288 and 347 nm.

# Compound 2

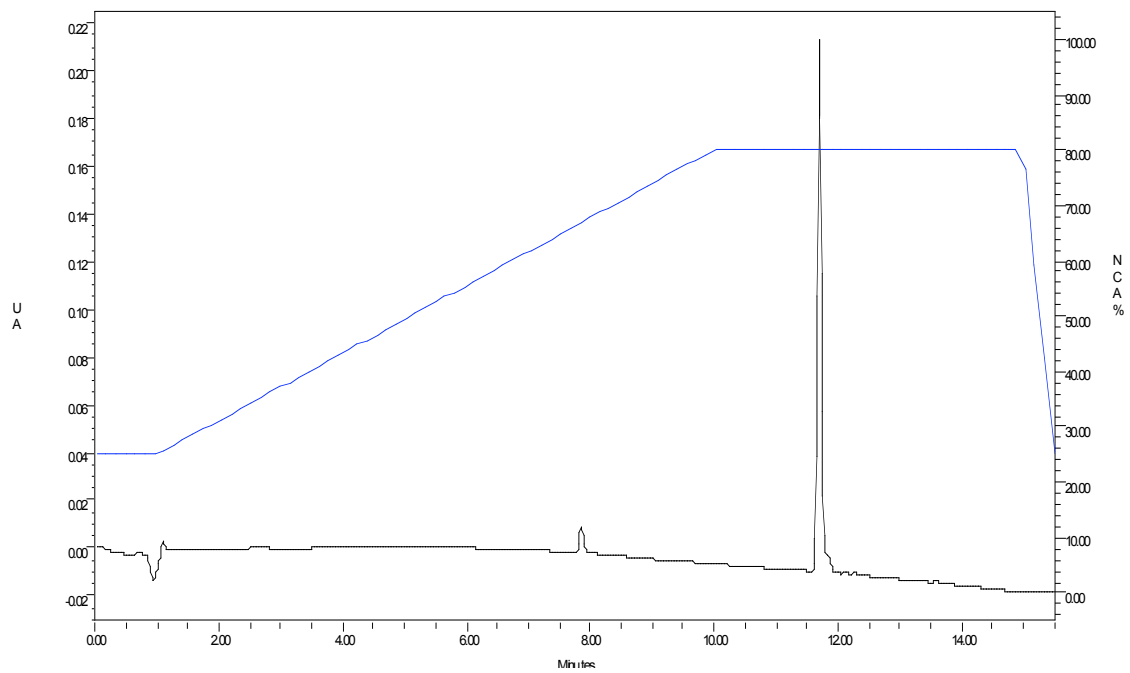

# Compound 9

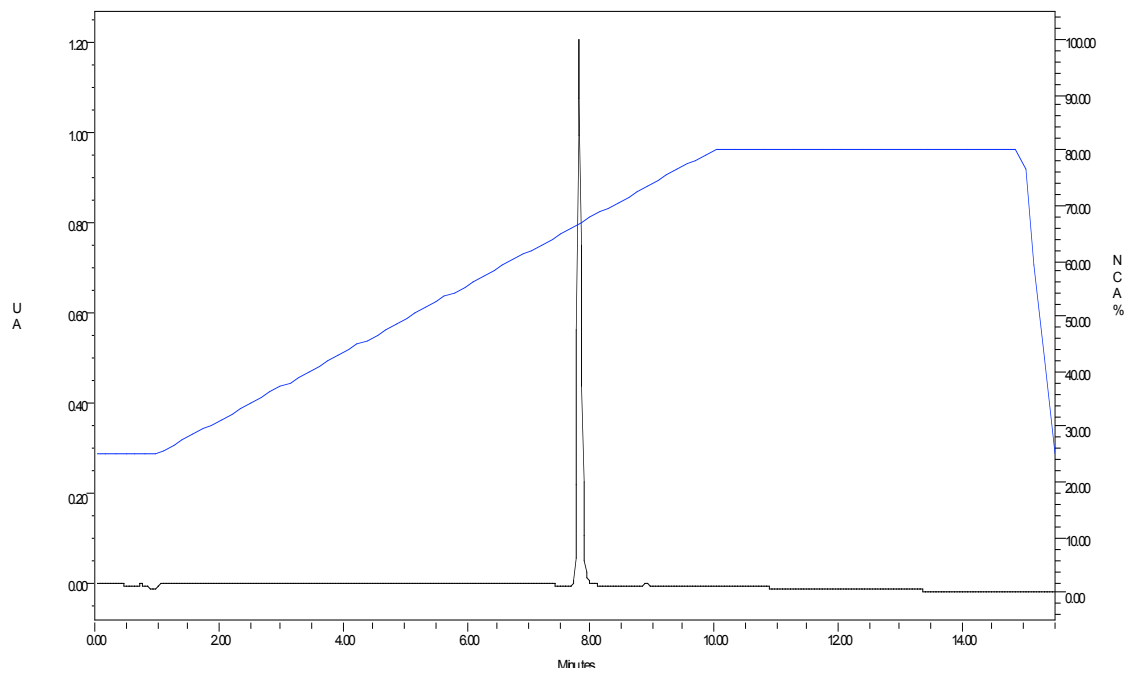

# Compound 10

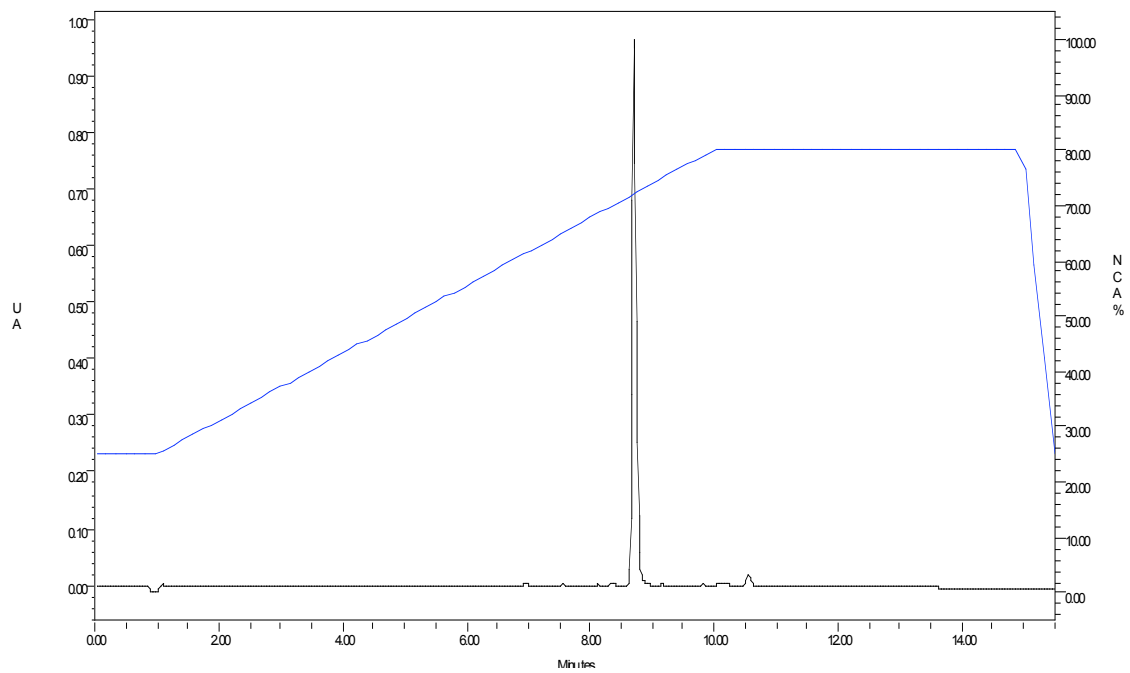

# Compound 11

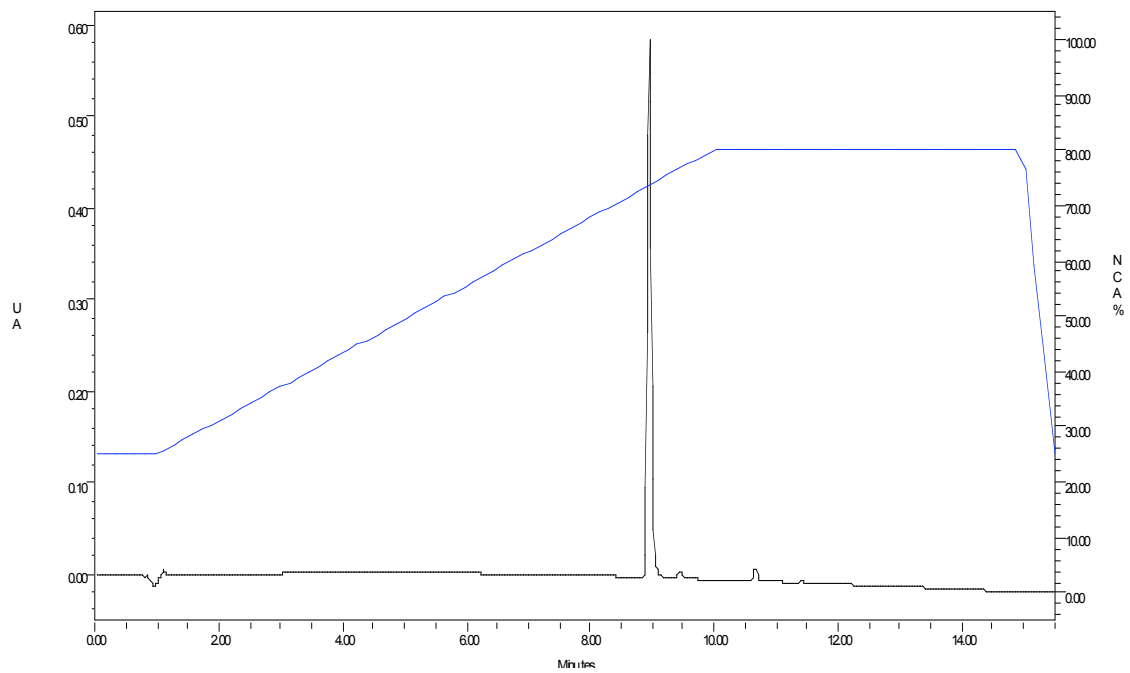

# Compound 12



# Compound 13

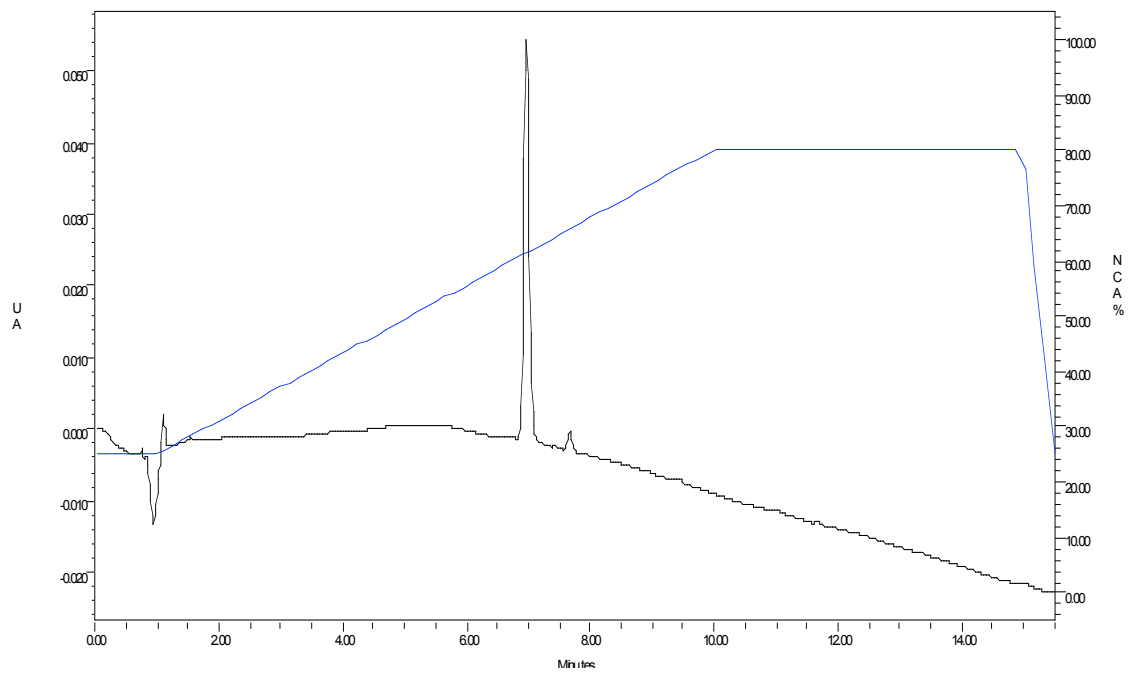

# Compound 14

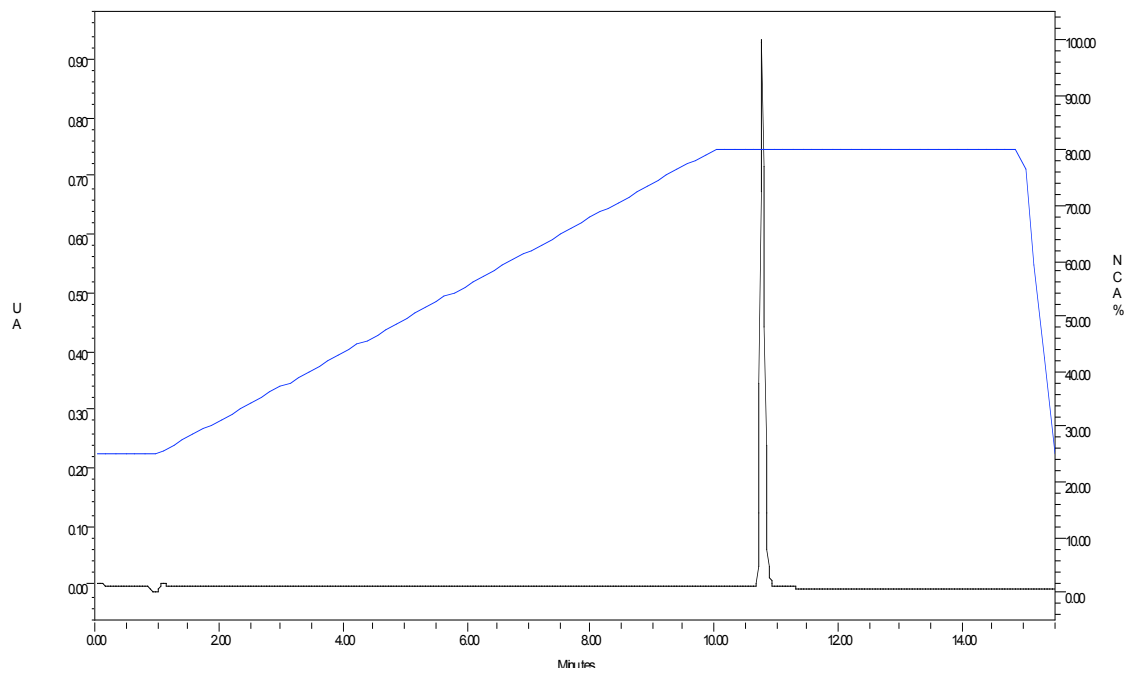



# Compound 15

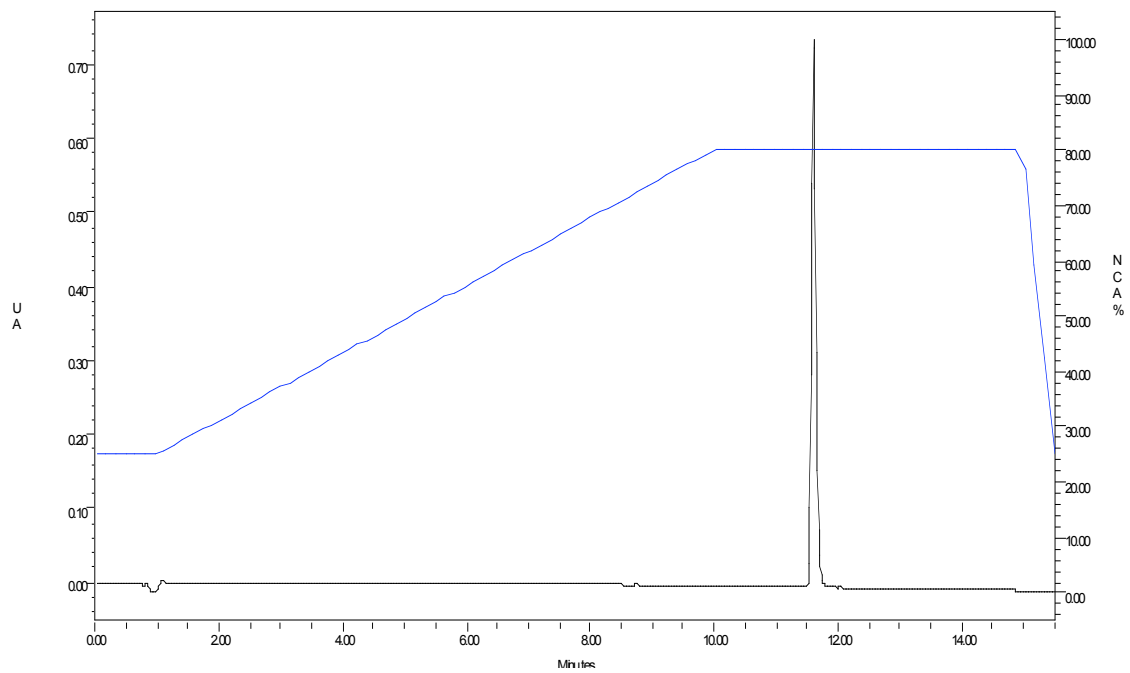

# Compound 16

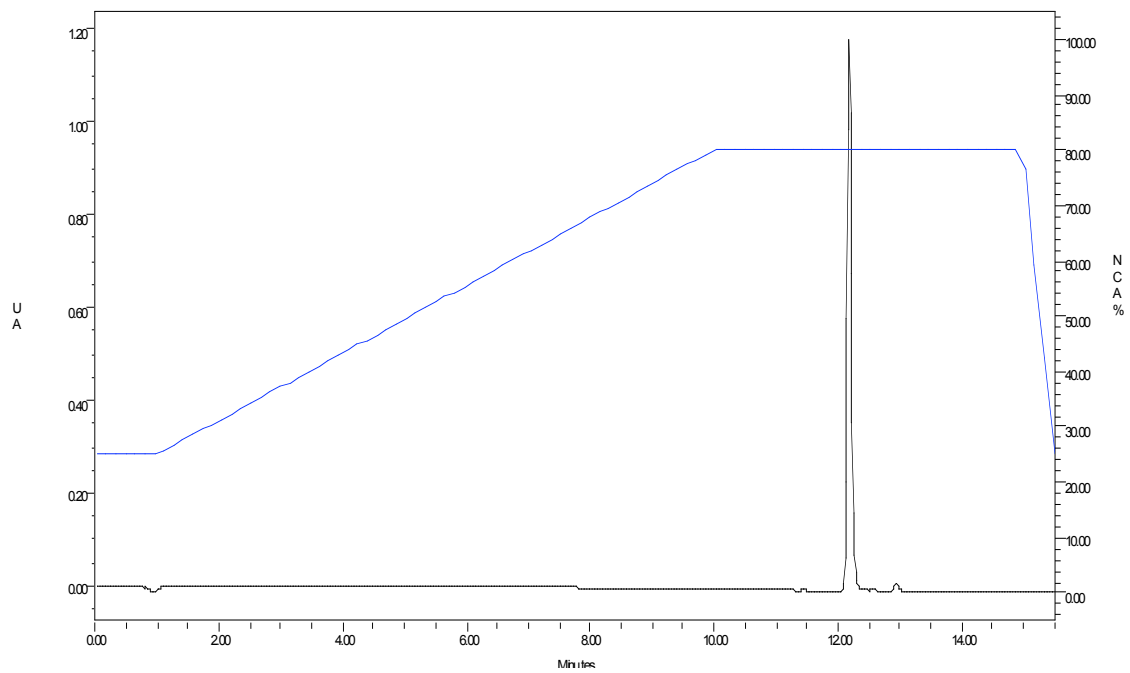

# Compound 17

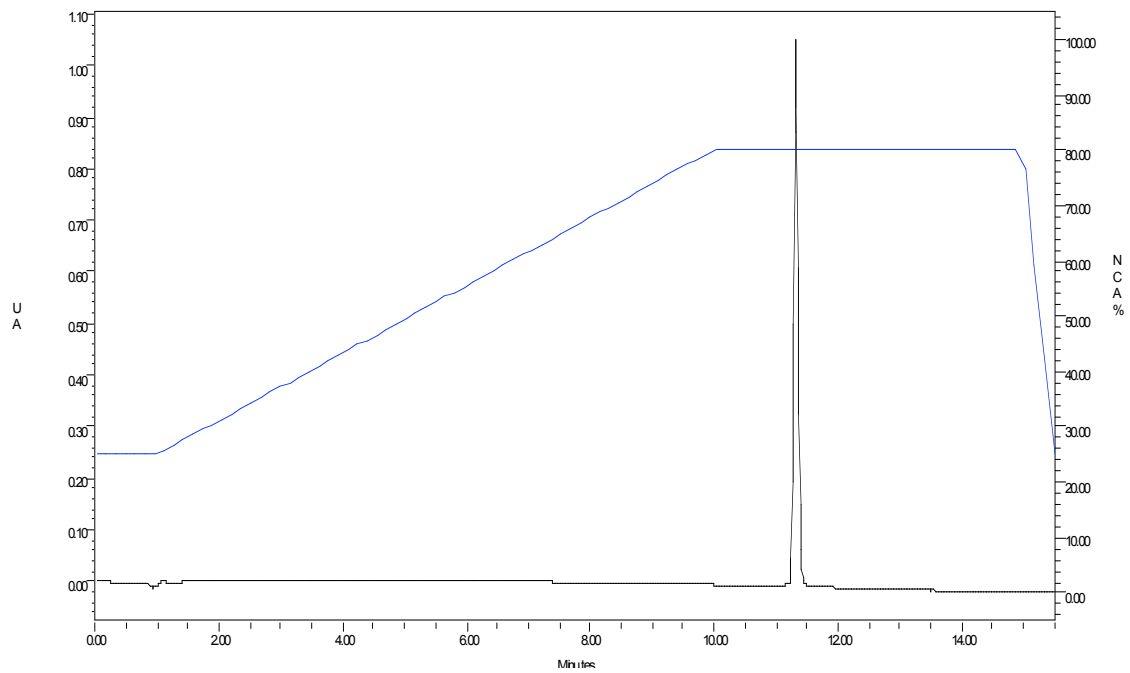

# Compound 18

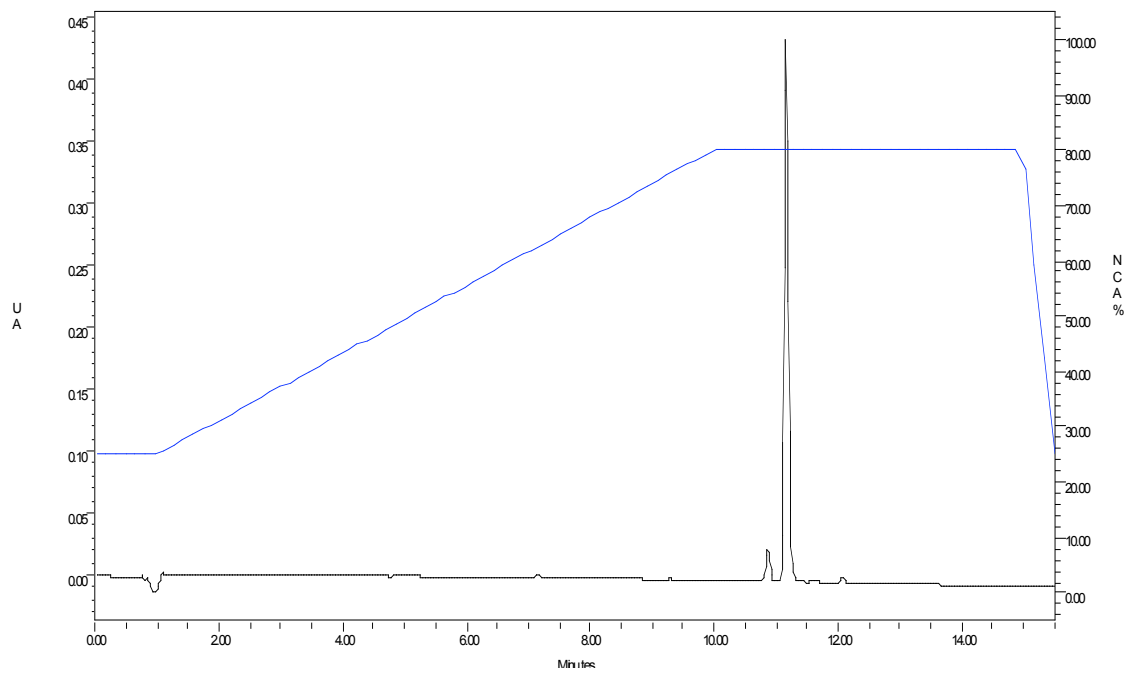

# Compound 19

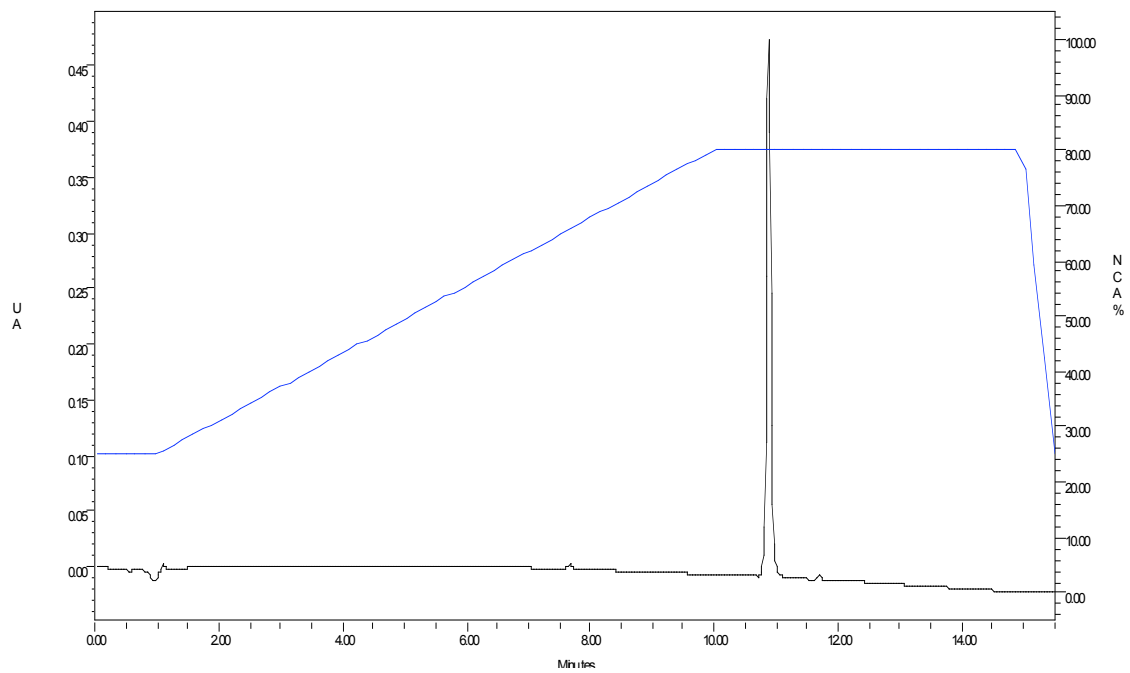

# Compound 20

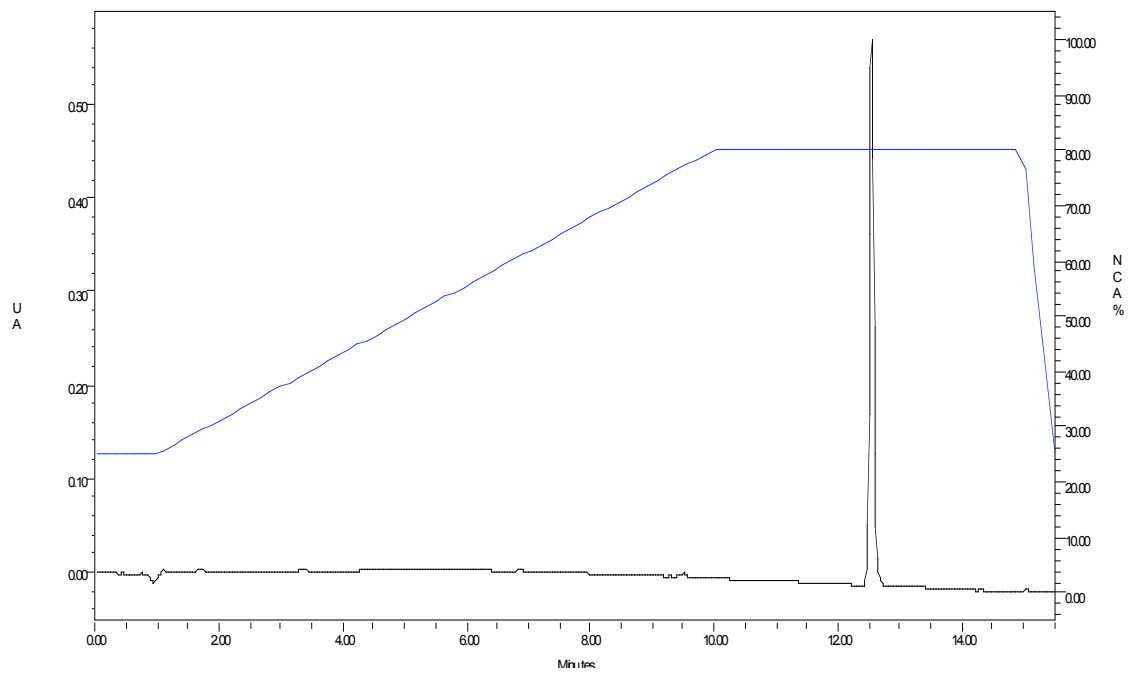

# Compound 21

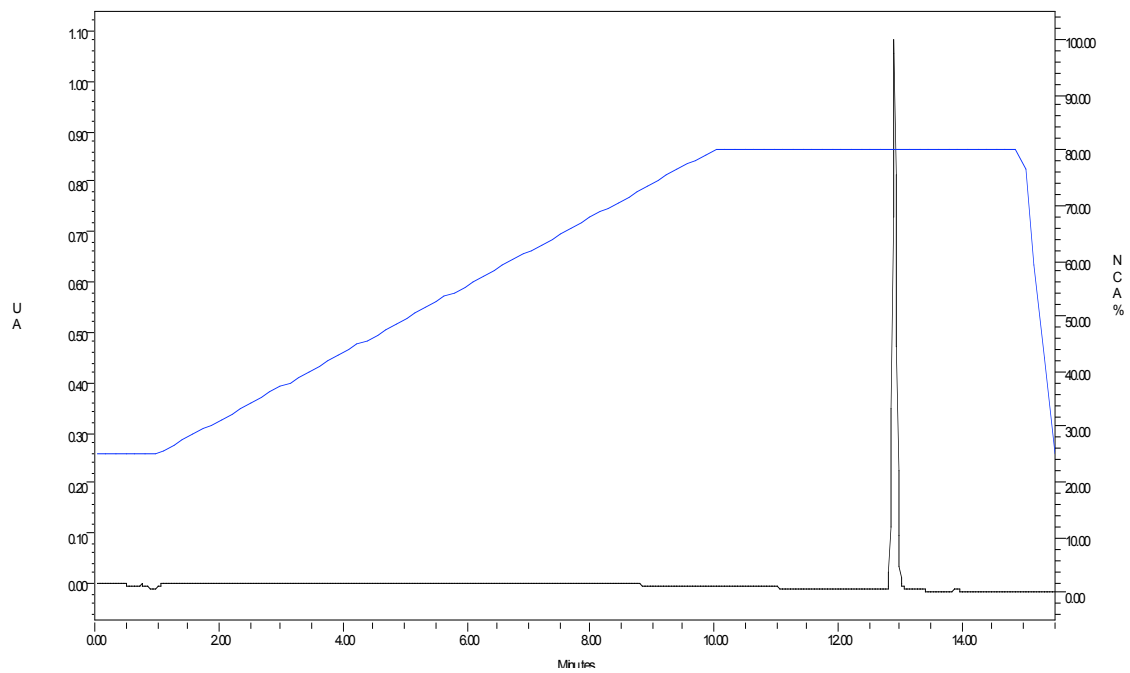

# Compound 22

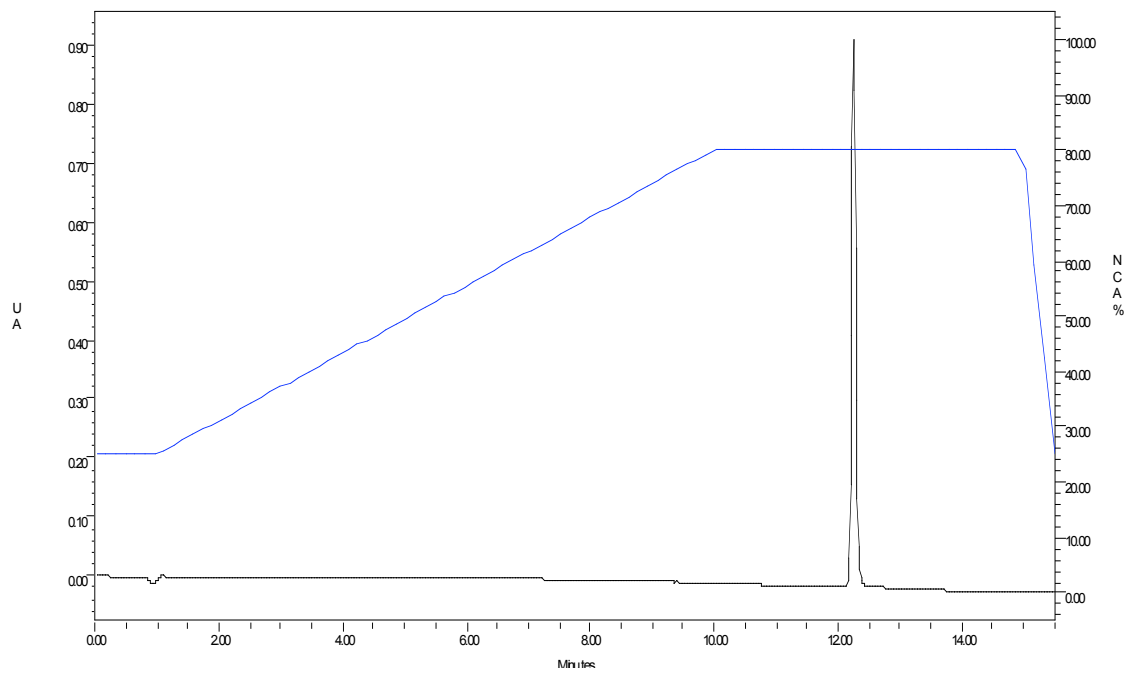



# Compound 23

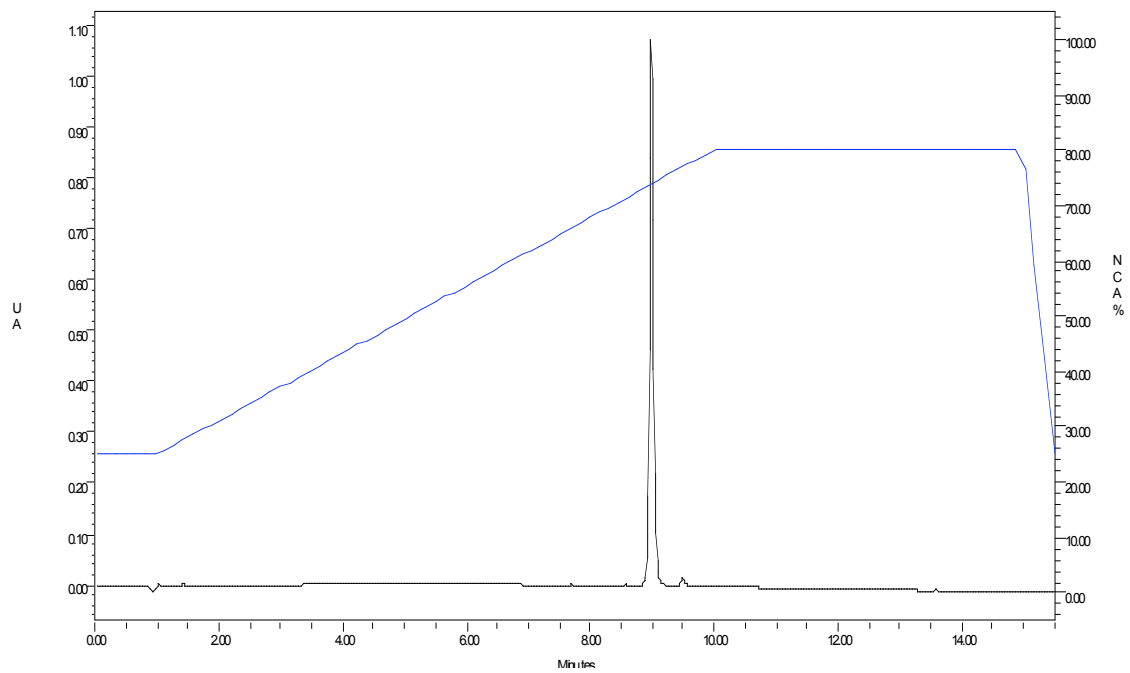

# Compound 24

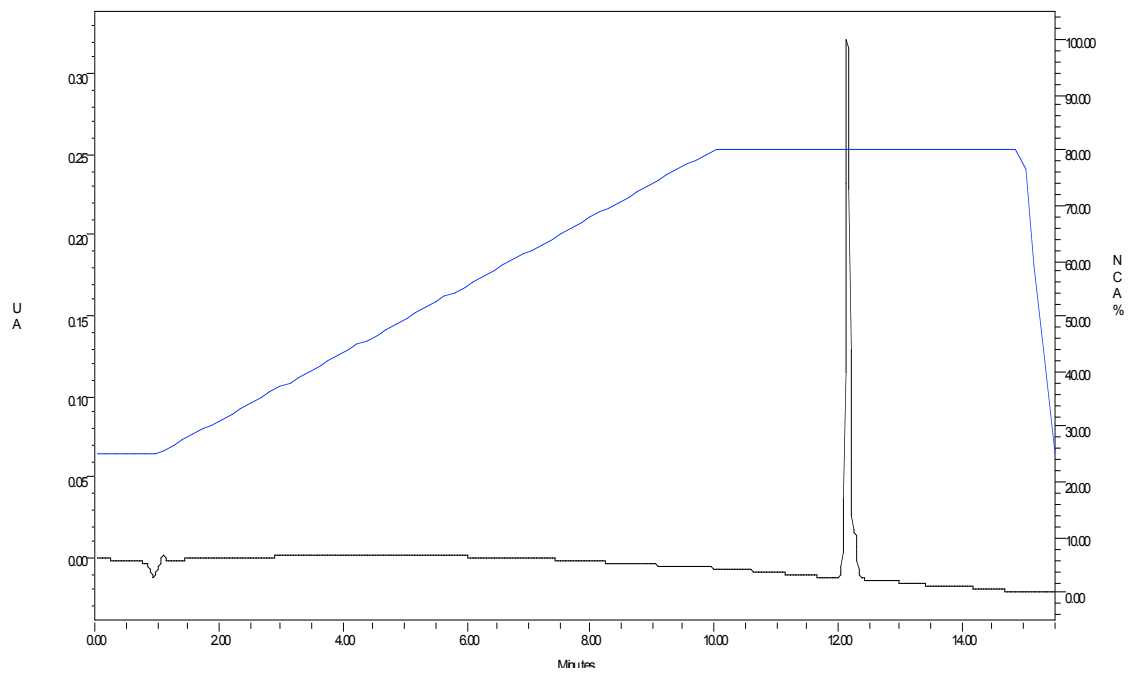

# Compound 25

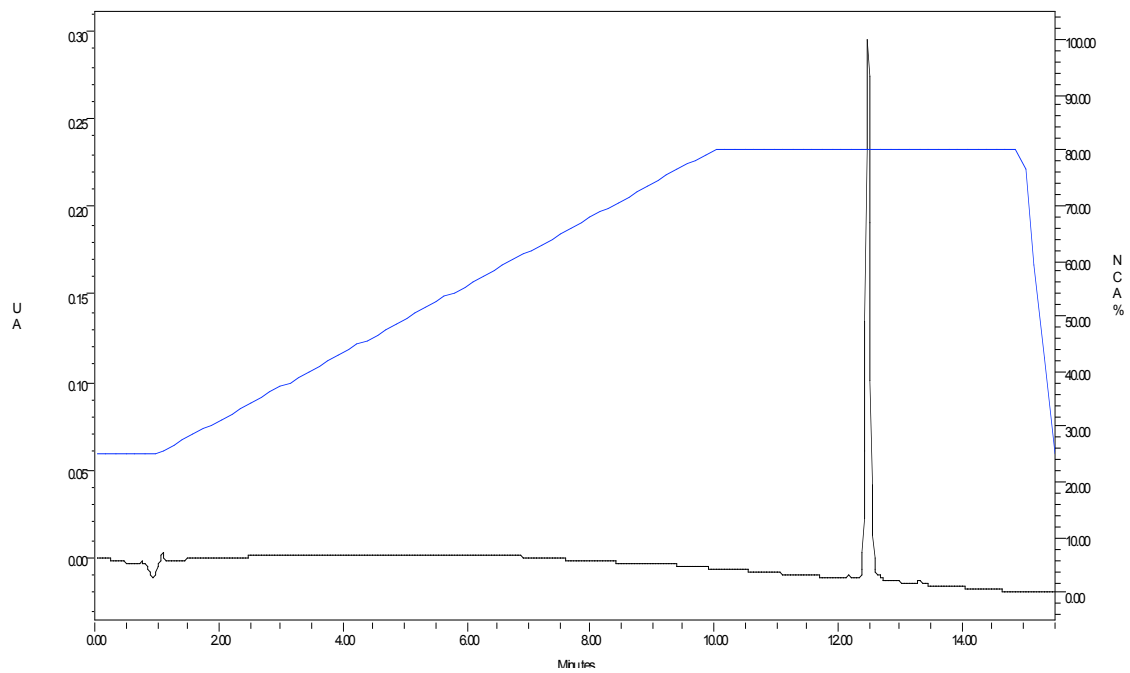

# Compound 26

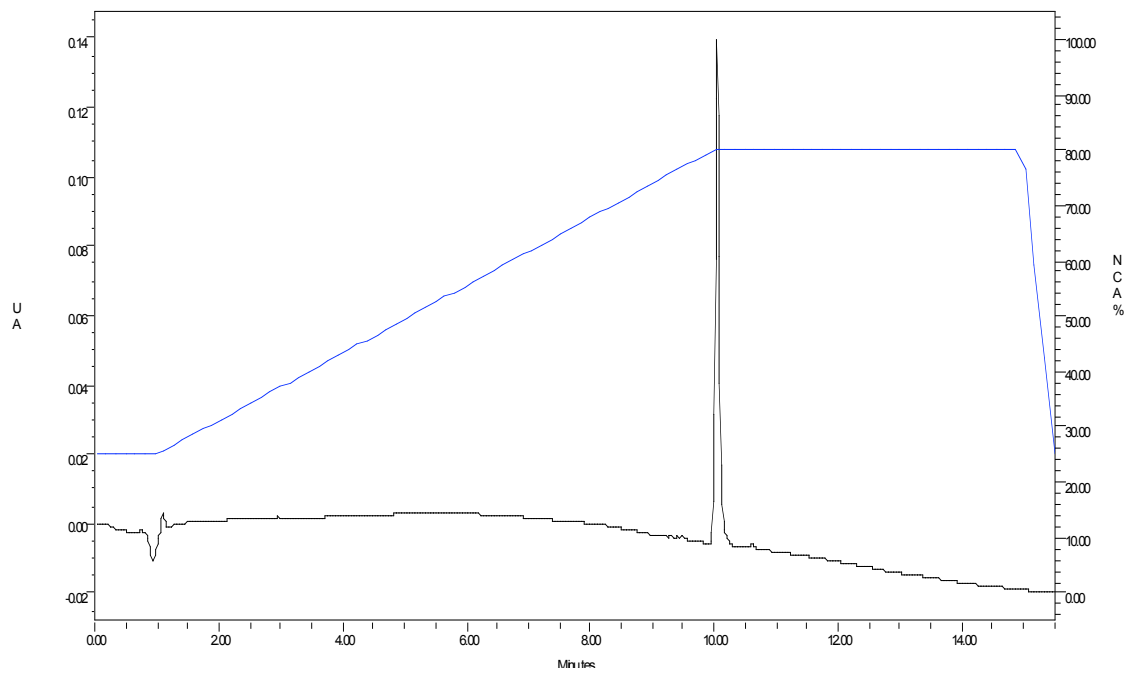

# Compound 27

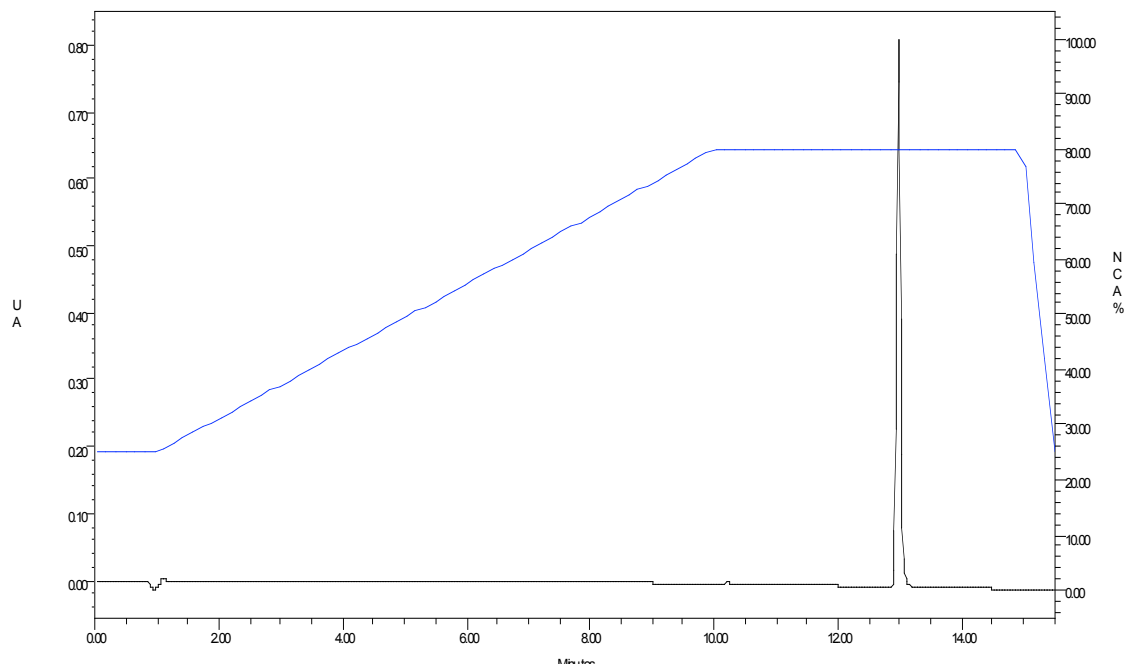

# Compound 28

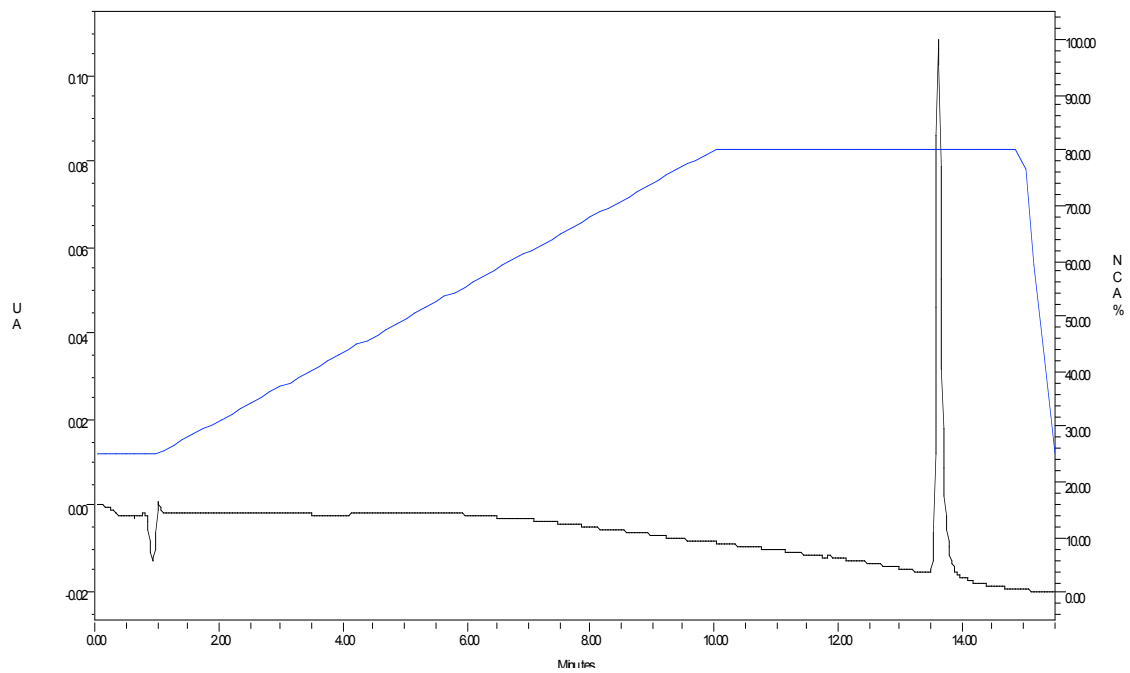

# Compound 29

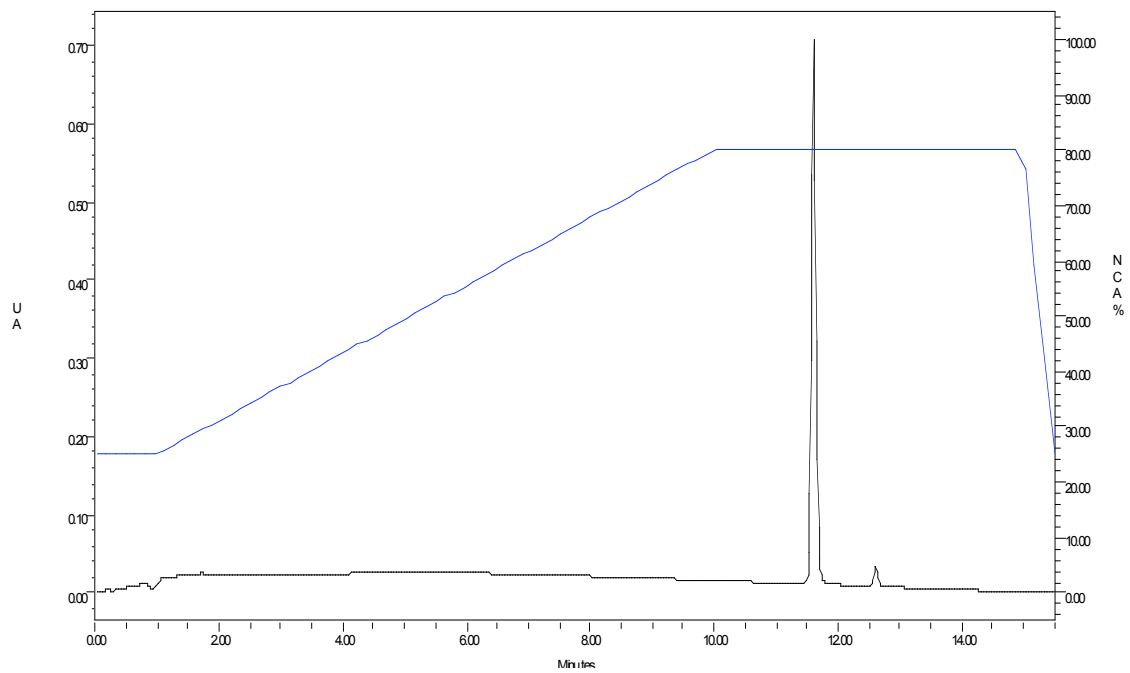

Supplement: jm700969c-File001.pdf [file jm700969c-File001.pdf]
